# Supplementary material for: Assessment of Health Care Exposures and Outcomes in Adult Patients With Sepsis and Septic Shock
Source: PubMed Central journal article supplement (PMC7341174; doi:10.1001/jamanetworkopen.2020.6004), 2020-07-07
Supplement: jamanetwopen-3-e206004-s001.pdf [file jamanetwopen-3-e206004-s001.pdf]

## Supplementary Online Content

Fay K, Sapiano MRP, Gokhale R, et al. Assessment of health care exposures and outcomes in adult patients with sepsis and septic shock. *JAMA Netw Open*. 2020;3(7):e206004.  
doi:10.1001/jamanetworkopen.2020.6004

**eTable 1.** Determining the Causative Pathogen: Specimen Type, Test Type, and Criteria

**eTable 2.** Variables Included in the Multivariable Model Assessing Risk Factors Associated With Mortality at 30 Days After Sepsis Diagnosis

This supplementary material has been provided by the authors to give readers additional information about their work.

**eTable 1.** Determining the Causative Pathogen: Specimen Type, Test Type, and Criteria

| Specimen Type              | Test Type                      | Criteria to be included as a causative pathogen                                                                                                                                                           | Criteria to determine organism is not a causative pathogen                                                                    |
|----------------------------|--------------------------------|-----------------------------------------------------------------------------------------------------------------------------------------------------------------------------------------------------------|-------------------------------------------------------------------------------------------------------------------------------|
| Blood                      | Positive Microbiologic Culture | All bacteria, viruses, fungi                                                                                                                                                                              | Common commensals <sup>1</sup>                                                                                                |
|                            | Non-culture Diagnostic Test    | All bacteria, fungi, parasites, viruses                                                                                                                                                                   |                                                                                                                               |
| Cerebral Spinal Fluid      | Positive Microbiologic Culture | All bacteria, viruses, fungi, parasites                                                                                                                                                                   |                                                                                                                               |
|                            | Non-culture Diagnostic Test    |                                                                                                                                                                                                           |                                                                                                                               |
| Lower Respiratory Specimen | Positive Microbiologic Culture | -- All viruses and bacteria if lower respiratory or pneumonia infection indicated<br>-- Included certain fungi ( <i>Cryptococcus</i> and <i>Cladosporium</i> ) regardless of whether infection documented | -- Common commensals <sup>2</sup><br>-- All viruses/bacteria/fungi if lower respiratory or pneumonia infection not documented |
|                            | Non-culture Diagnostic Test    | All viruses                                                                                                                                                                                               | <i>Candida</i> spp or other yeast                                                                                             |
| Pleural fluid              | Positive Microbiologic Culture | Include all bacteria, viruses, fungi                                                                                                                                                                      |                                                                                                                               |
| Stool                      | Positive Microbiologic Culture | -- All parasites<br>-- Bacteria, fungi, viruses based on documentation of clinical infection                                                                                                              |                                                                                                                               |

|                                   |                                       |                                                                                                                                        |                                                                                     |
|-----------------------------------|---------------------------------------|----------------------------------------------------------------------------------------------------------------------------------------|-------------------------------------------------------------------------------------|
|                                   | <b>Non-culture Diagnostic Test</b>    | <i>Clostridium</i> spp. and viruses                                                                                                    |                                                                                     |
| <b>Urine</b>                      | <b>Positive Microbiologic Culture</b> | -- Bacteria/fungi if urinary tract infection was documented as an infection<br>-- All parasites ( <i>Echinococcus</i> )                | Bacteria/fungi without documented urinary tract infection                           |
|                                   | <b>Non-culture Diagnostic Test</b>    | -- Include <i>Legionella/Streptococcus pneumoniae</i> antigen test positive results                                                    | Yeast (i.e. beta-d-glucan), certain viruses if no clinical information              |
| <b>Wound</b>                      | <b>Positive Microbiologic Culture</b> | All bacteria/fungi/viruses if skin and soft tissue infection indicated and/or bone and joint infection documented                      | Bacteria/fungi/viruses if no infection documented                                   |
|                                   | <b>Non-culture Diagnostic Test</b>    | All fungi, bacteria, viruses only if patient has skin or soft tissue infection or bone and joint infection                             | Bacteria/viruses/fungi if no infection documented                                   |
| <b>Other Specimen<sup>3</sup></b> | <b>Positive Microbiologic Culture</b> | All bacteria, fungi or viruses isolate from cultures of normally sterile sites                                                         |                                                                                     |
|                                   | <b>Non-culture Diagnostic Test</b>    | --All bacteria from a sterile site<br>--Certain bacteria/fungi/viruses from non-sterile sites depending on site and clinical infection | Bacteria/fungi/viruses if no corresponding infection indicated in the medical chart |

<sup>1</sup>Based on National Healthcare Safety Network (NHSN) criteria for common commensals.

<sup>2</sup>*Candida* spp, coagulase-negative *Staphylococcus* species, *Enterococcus* species.

<sup>3</sup>Sterile sites: abdominal abscess, abdominal fluid, abdominal tissue, abscess, blood, bone, brain, eye, maxillary fluid, mediastinum fluid, heart tissue, joint tissue, kidney tissue, lung tissue, lymph nodes, peritoneal fluid, pelvic fluid, pleural biopsy fluid, plasma, serum, shoulder tissue, shut fluid, sinus fluid, brain tissue or other general tissue, thigh fascia, fluid from a thoracentesis, vitreous tissue, muscle . Non-sterile sites: skin abscess, anal swab, bronchialverolar lavage fluid, catheter tips, cervical swab, cheek tissue, chest tube, endotracheal tube, esophageal tissue, eye tissue, fluid (unknown location), gallbladder tissue, cervical swab, groin swab, stomach tissue, incision wound, nephrostomy, nasal swabs, mouth, skin swabs, catheter swabs, vaginal culture, skin, bile.

**eTable 2.** Variables Included in the Multivariable Model Assessing Risk Factors Associated With Mortality at 30 Days After Sepsis Diagnosis

| Variable                                  | Levels | Reference level                                         | Values                                                                                                                                                                                                   |
|-------------------------------------------|--------|---------------------------------------------------------|----------------------------------------------------------------------------------------------------------------------------------------------------------------------------------------------------------|
| Gender                                    | 2      | Male                                                    | Female; Male                                                                                                                                                                                             |
| Age group                                 | 4      | 18-44 years old                                         | 18-44 years old; 45-64 years old; 65-84 years old; 85 years and older                                                                                                                                    |
| Race                                      | 3      | White                                                   | Black; White; Not black or white                                                                                                                                                                         |
| Diabetes                                  | 2      | No                                                      | Yes, No                                                                                                                                                                                                  |
| Immunosuppressed                          | 2      | No                                                      | Yes, No                                                                                                                                                                                                  |
| Vascular Disease                          | 2      | No                                                      | Yes, No                                                                                                                                                                                                  |
| Pulmonary Disease                         | 2      | No                                                      | Yes, No                                                                                                                                                                                                  |
| Alcohol Abuse                             | 2      | No                                                      | Yes, No                                                                                                                                                                                                  |
| Smoking                                   | 2      | No                                                      | Yes, No                                                                                                                                                                                                  |
| Intravenous Drug Use                      | 2      | No                                                      | Yes, No                                                                                                                                                                                                  |
| Cirrhosis                                 | 2      | No                                                      | Yes, No                                                                                                                                                                                                  |
| Chronic Dialysis                          | 2      | No                                                      | Yes, No                                                                                                                                                                                                  |
| Organ dysfunction within 7 days           | 2      | No organ dysfunction                                    | No organ dysfunction; Organ dysfunction within 7 days                                                                                                                                                    |
| Septic Shock                              | 2      | No shock                                                | No shock; Shock                                                                                                                                                                                          |
| Any medical treatment in prior 30 days    | 2      | None                                                    | Any treatment in prior 30 days; None                                                                                                                                                                     |
| Antimicrobial therapy in prior 30 days    | 2      | Antimicrobial therapy                                   | Antimicrobial therapy; None                                                                                                                                                                              |
| Device use in prior 30 days               | 2      | Any device in prior 30 days                             | Any device in prior 30 days; None                                                                                                                                                                        |
| Documented infections                     | 8      | No infection documented on discharge as cause of sepsis | Abdominal; More than one infections documented on discharge as cause of sepsis; No infection documented on discharge as cause of sepsis; Other; Respiratory; Skin and Soft Tissue; Undetermined; Urinary |
| Causative pathogen                        | 2      | No pathogen                                             | No pathogen; Any pathogen                                                                                                                                                                                |
| Location 4 days prior to sepsis diagnosis | 4      | Private residence                                       | Private residence; Nursing home/skilled nursing facility; Long term acute care hospital or other acute care hospital; Other                                                                              |
| Community or hospital onset               | 2      | Community onset                                         | Community onset; Hospital onset                                                                                                                                                                          |
| Outpatient medical encounter              | 2      | None                                                    | Any Outpatient encounter; None                                                                                                                                                                           |
| Influenza or pneumococcal vaccine         | 2      | Receipt of either vaccine                               | Influenza or pneumococcal vaccine; Neither                                                                                                                                                               |
